# Supplementary material for: Ethanol Extract of Caesalpinia decapetala Inhibits Influenza Virus Infection In Vitro and In Vivo
Source: Viruses. 2020 May 18;12(5):557. doi: 10.3390/v12050557 (PMC7290740; doi:10.3390/v12050557)
Supplement: Supplementary file 1 [file viruses-12-00557-s001.pdf]

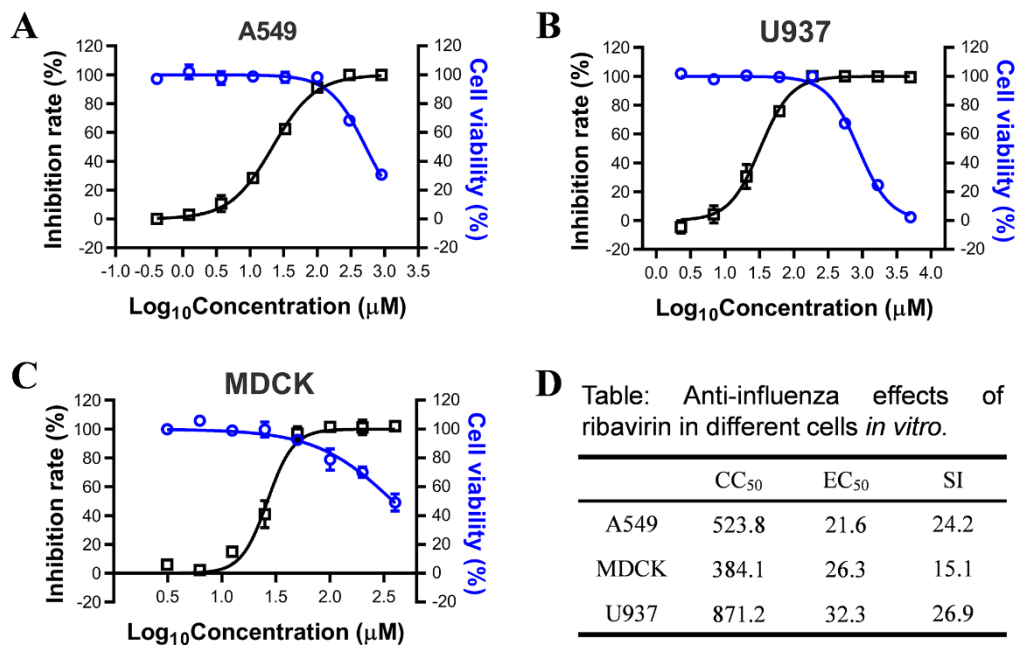

**Supplemental Figure 1. Antiviral effects of ribavirin against influenza virus PR8 were determined in A549, U937, and MDCK cells.** Ribavirin was used as a reference drug and tested for its antiviral activity and cytotoxicity as described in the Methods section on A549 (A), U937 (B), and MDCK (C) cells. The EC<sub>50</sub>s and CC<sub>50</sub>s were determined and summarized in D.

**A**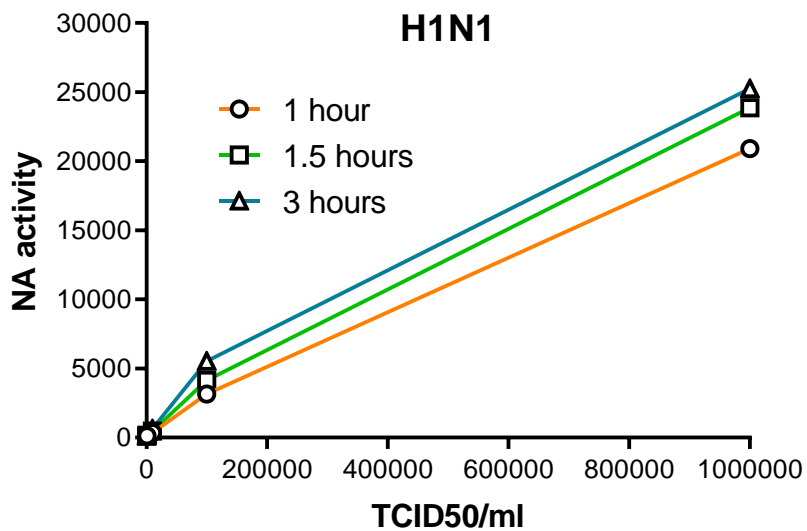**B**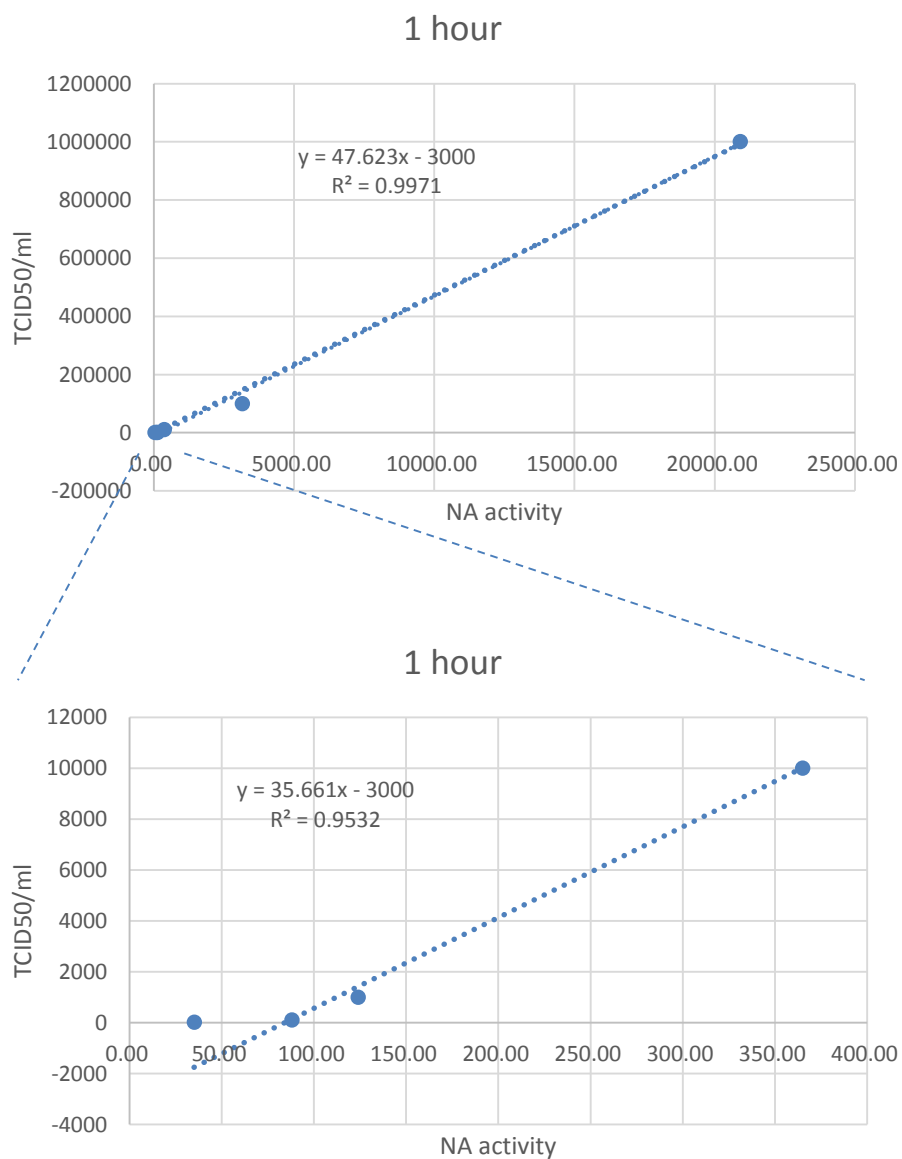

C

1.5 hours

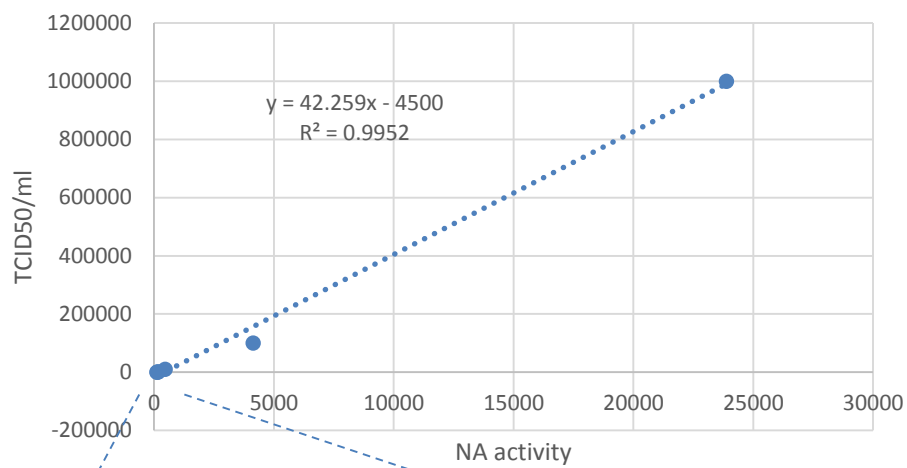

1.5 hours

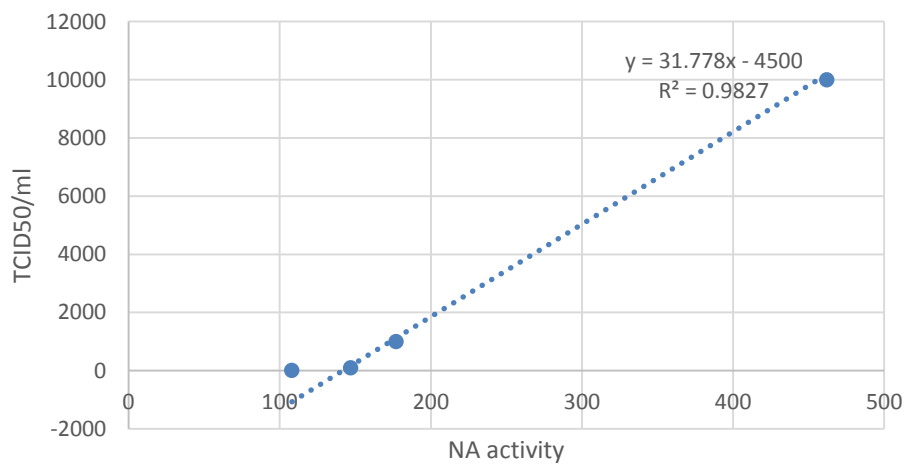

**D**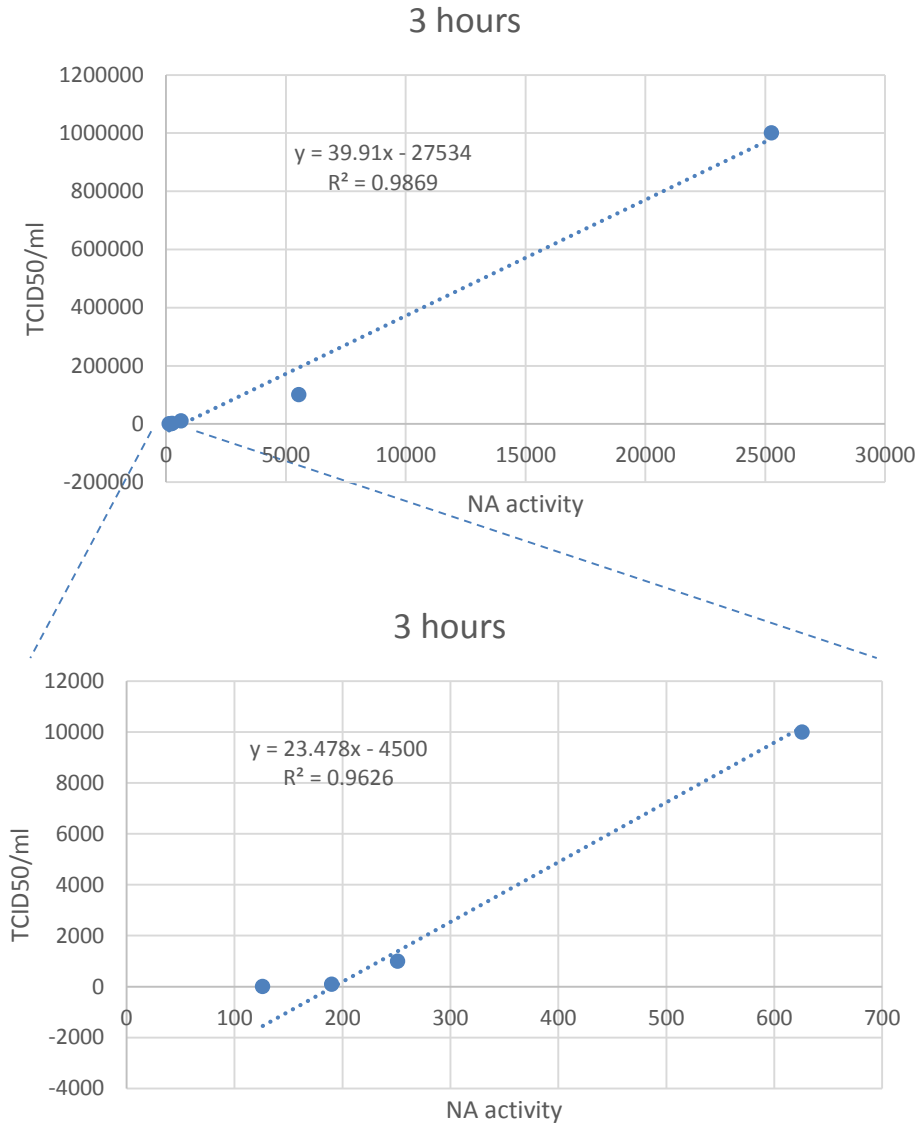

**Supplemental Figure 2. Correlation analysis of the TCID50 and neuraminidase (NA) activity of influenza virus solutions produced in cell culture.** (A) TCID50s are correlated with NA activity. Influenza PR8 virus stock solution was serially diluted to prepare virus solutions of 10, 100, 1000, 10000, 100000, and 1000000 TCID50/ml. Forty  $\mu$ l of each virus solution at different titer was mixed with 20  $\mu$ l of the fluorescent substrate, 2'-(4-Methylumbelliferyl)- $\alpha$ -D-N-acetylneuraminic acid (MUNANA, Sigma, M8639), on a black opaque 96 (PerkinElmer, 6005270). The reactions were incubated at 37  $^{\circ}$ C for 1 to 3 hours. The fluorescence intensity was measured at an excitation wavelength of 355 nm and an emission wavelength of 485 nm using multi-label plate readers (Envision2103, PerkinElmer, MA, USA). To further analyse the correlation of TCID50 and NA of influenza virus solutions over a wide range of virus titers and NA activities, the data determined using the NA assay for 1 hour (B), 1.5 hours (C), and 3 hours (D) were shown individually. An equation for each data sets was obtained by linear regression analysis with a coefficient of correlation of  $> 0.95$  using Microsoft Excel 2016.
